# Supplementary material
Source: PubMed Central journal article supplement (PMC516574)
Supplement: pnas_101_36_13374__3.pdf [file pnas_101_36_13374__3.pdf]

# SNH

**BsSYT** 1 MSVAFAAPRQR---GKGEITFAAIQKMLDDNNELIQCI MDSQWKGKTSECSQYQMLR TNLVYLAT IADSIQNMQS  
**GIF1** 1 MQQELMQM QPMMA--GYYPSEVTS DHIQQYLDENKSLILKIVESQW SGKLSECAENQARLQRNLMYLAARIADS-Q----  
**GIF2** 1 MQQQSPQMFPMPVP-SIIPANNITTEQIQKYLDENKKLIMAIMENQWLGKLAECAQYQALLQKNLMYLAARIADA-Q----  
**GIF3** 1 NQQSPQMI PMVLPSEFPPTNITTEQIQKYLDENKKLIMAI LENQWLGKLAECAQYQALLQKNLMYLAARIADA-Q----

**BsSYT** 70 LLPAPPTQNMPMGFGGMNQS GPPPPPSHHMPSDGNVGGGPPAPHMQNMGGQMPGPNHMPMQGPGPNQLMNTNSSMMNP  
**GIF1** 73 --PQPPSVHSQYGSAGGSMIQGE-----  
**GIF2** 75 --PPPPTPGPSPSTAVAAQMATP-----  
**GIF3** 74 --PQPPAATLTSQAMTFQAMRPM-----

# Q(P)G(Y)

**BsSYT** 150 SSSHGSMGGYNHSVPSSQ SMPVQNQMTMSQGGPMGNYGPRPWNMGMQPNQGPMMHQQPSSQQYQMPQGGGQHYQGGQPFMG  
**GIF1** 94 -----GSSHYLQQQRATQQQMT-----QQSLMAARSSMLYAQ---QQQQQPFYAT-L-----QHQLBHSQLG  
**GIF2** 96 -----HSGMQPP-SYFMQHPQAS-----PRGIFAPRGP LQFGS---PLQFQDPQQQQQ-----IHQQAMQGHMG  
**GIF3** 95 -----PSSMQPPSYFMQQHQAVGMAQQI PFGIFPFRGFLQFGS---PHQFLDPQQQ-----LHQQAMQGHMG

**BsSYT** 230 NMGQVNQGNHMMGQRQIPPYRPPQQGPPQQYSGQEDYYGDQYSHGGQGPPEGMMQQYYPDGSQYGGQQQDAYQGPPFQQG  
**GIF1** 149 MS-----SSSGGGGS-----SGLHILQGEAGGFDFGRG--K-----P-----  
**GIF2** 151 IR-----EMGNTWN-----GMQHAMQQEETGLGN-----  
**GIF3** 155 IR-----EMGLNWN-----GLQHQMHHETALAANNAQPNDAAGGGK-----

**BsSYT** 310 YFPQQQQYPGQQGYPGQQQGYGPSQGGGPFQYPHYYPQGGQQYGGYRPTQPGPPQFPQQRPYGYDQGYGYQQ  
**GIF1** 180 -----EMSGGGGEGRGGSSGDGGETLYLKSSDDGN  
**GIF2** 176 -----VGLRGGKQDGADEQEK-----DDEK  
**GIF3** 193 -----PDGTMSQSGADQGGSAARHGGDAKTEK
