# Supplementary material
Source: PubMed Central journal article supplement (PMC516574)

### Signal Intensity of *AtGRF1*

### Signal Intensity of *GIF1*

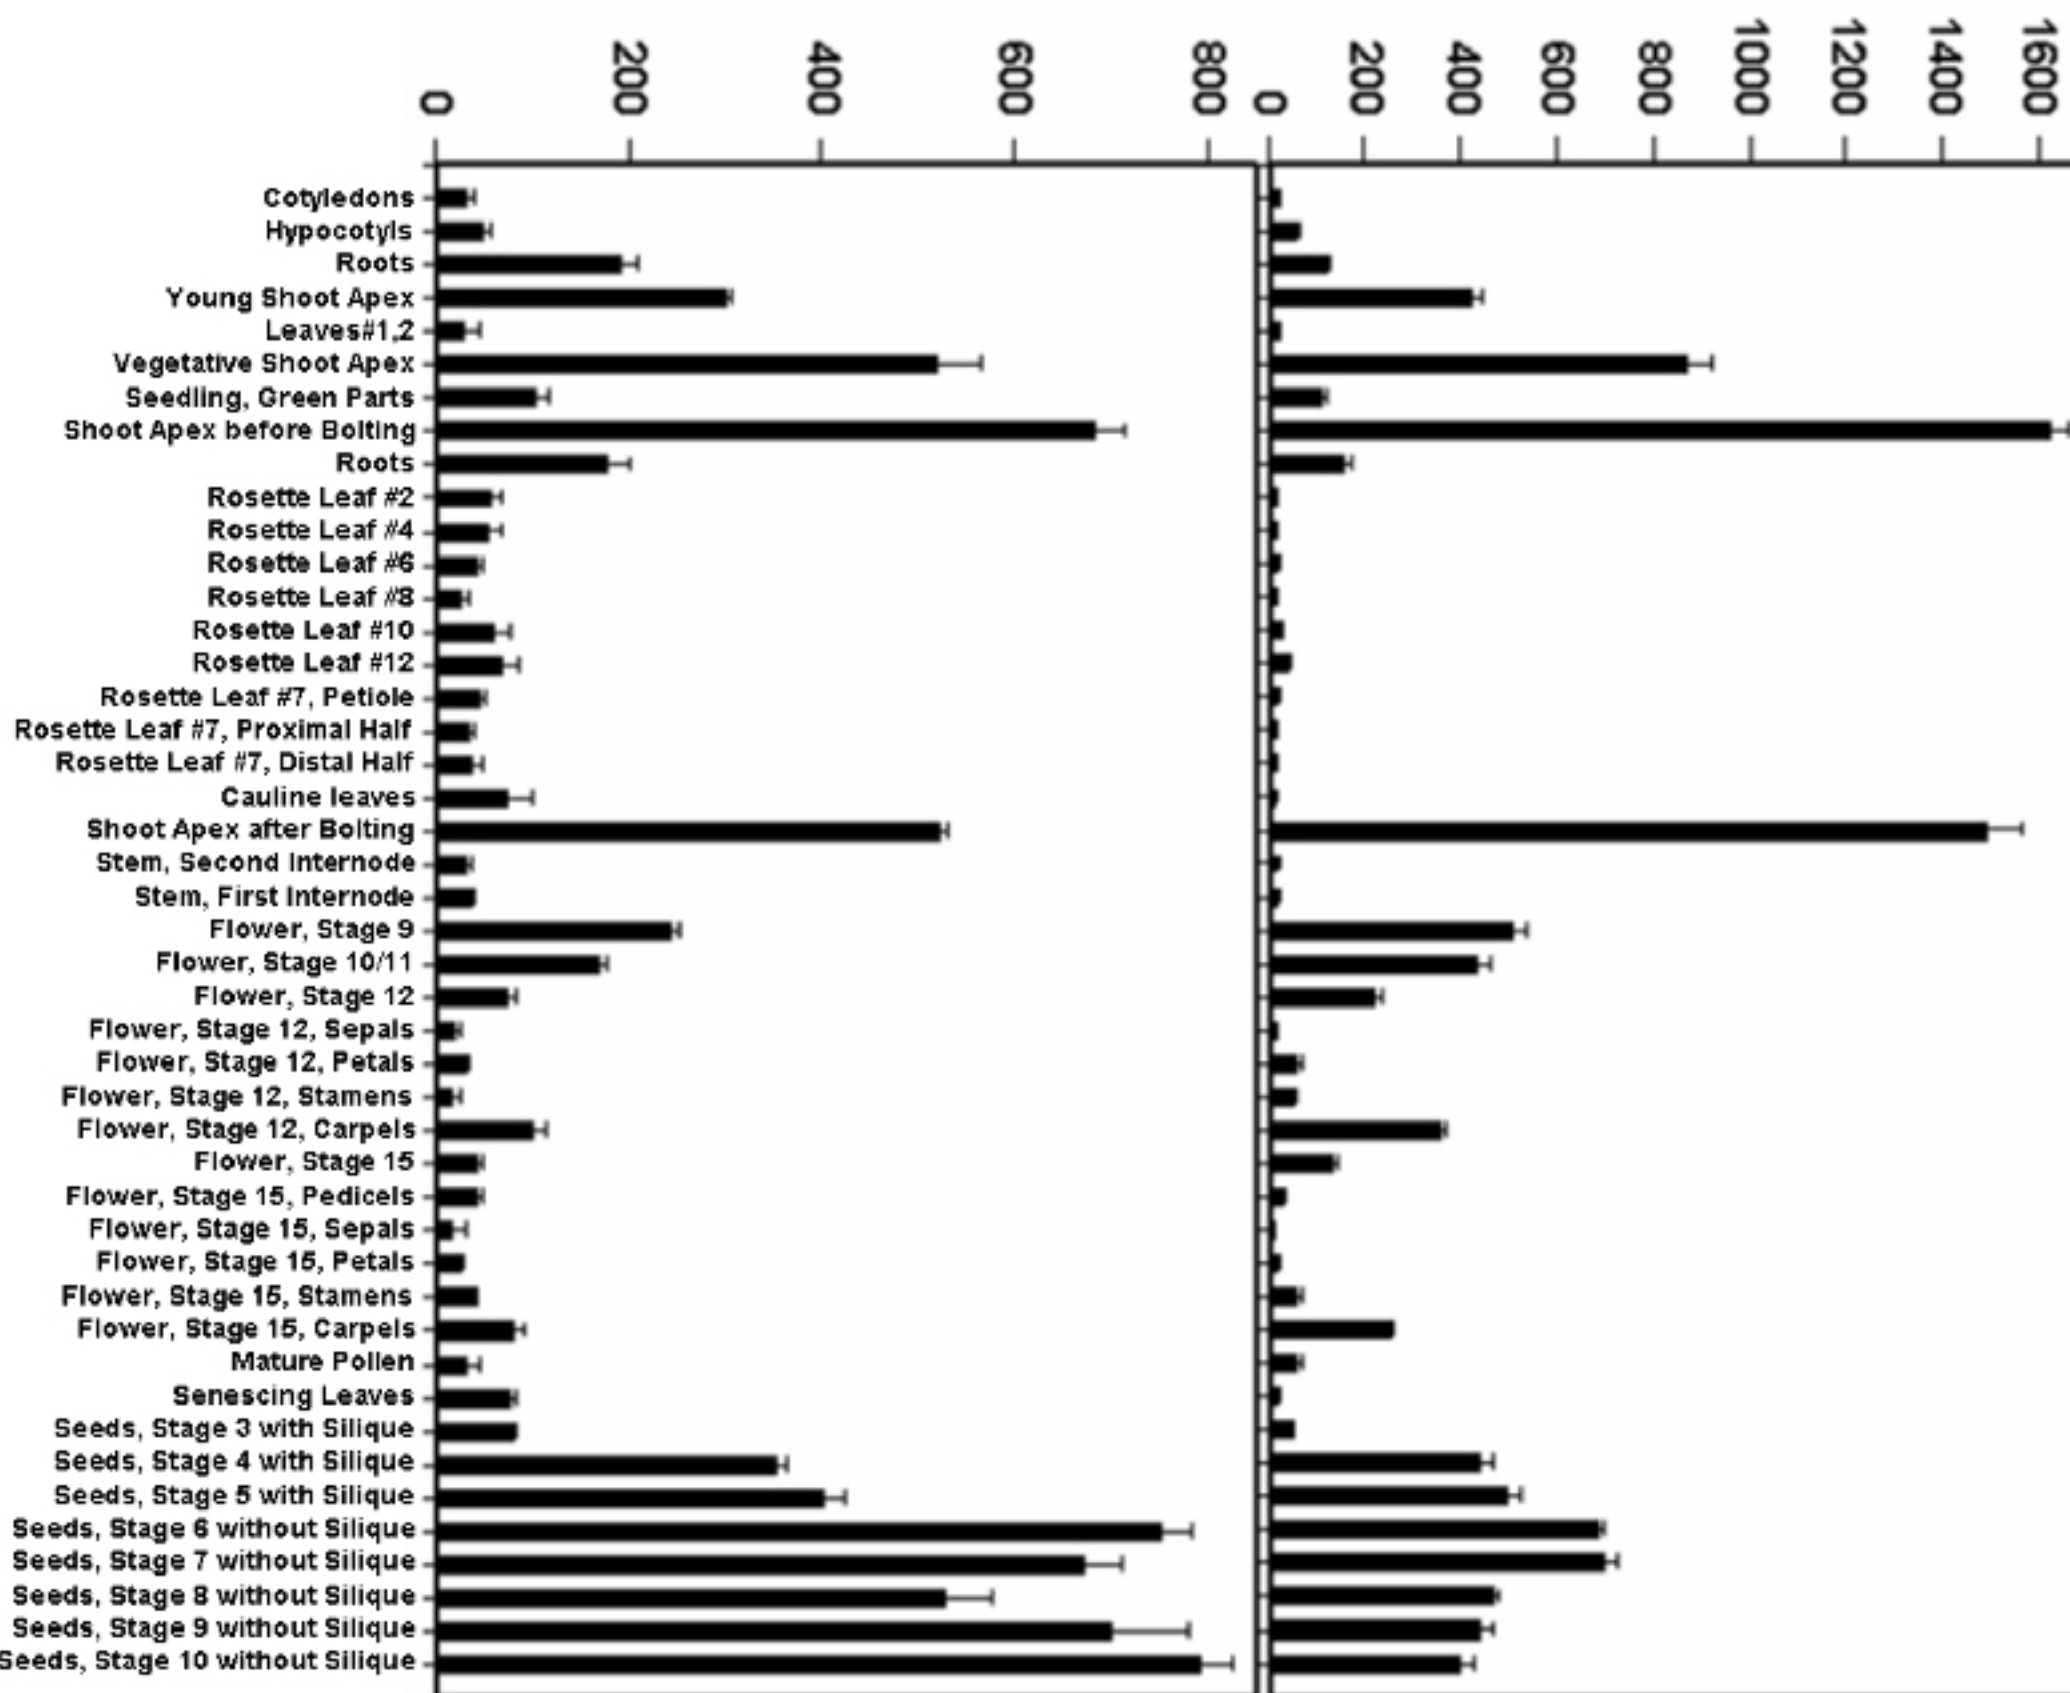

Supplement: pnas_101_36_13374__4.pdf [file pnas_101_36_13374__4.pdf]
